## Impacts of reservoir operation and urbanization on flood inundation in the Vu Gia Thu Bon Basin, Vietnam

Thuy Nga To , Huy Cong Vu and Hung Le

The University of Danang – University of Science and Technology, Danang City, Vietnam

\*Corresponding author. E-mail: ttnga@dut.udn.vn

 TNT, 0000-0002-4158-604X

### ABSTRACT

This study examines the effects of upstream reservoir operation and urbanization on flood inundation in the Vu Gia Thu Bon river basin. The alternative reservoir operation strategies corresponding to the flood storage capacity ( $V_{pl}$ ) of 10, 20, and 30% of the active storage capacity ( $V_{hi}$ ) are evaluated and compared with the prevailing inter-reservoir operation procedure in terms of inundation effects. The results reveal that increasing the  $V_{pl}$  from 10% to 30% of the  $V_{hi}$  reduces the flooded area by 11.8% and lowers the water level at downstream stations from 6% to 30%. The government's procedure is considered safe to supply water, but the inundation duration is longer, resulting in more damage than the scenario of  $V_{pl}=20\%V_{hi}$ . Regarding urbanization, the expansion of newly urbanized areas has resulted in increased flooding in their surrounding areas, with an increase in flood depth of more than 3 m. Moreover, the new roads have reduced the capacity of flood drainage and caused severe flooding. The water level difference between the two sides of the road can be as high as 2 m. This research will assist managers in developing and implementing appropriate downstream flood control measures.

**Key words:** flood, reservoir operation, urbanization, Vu Gia Thu Bon

### HIGHLIGHTS

- Three characteristics including flooded area, flood depth, and flood duration are analyzed.
- More detailed analysis of the impact of reservoir operation.
- In some areas, the highway increases the risk of flooding.
- The new urban areas are not flooded, but the surrounding areas are.
- Providing a basis for improving the government reservoir operations procedure.

## GRAPHICAL ABSTRACT

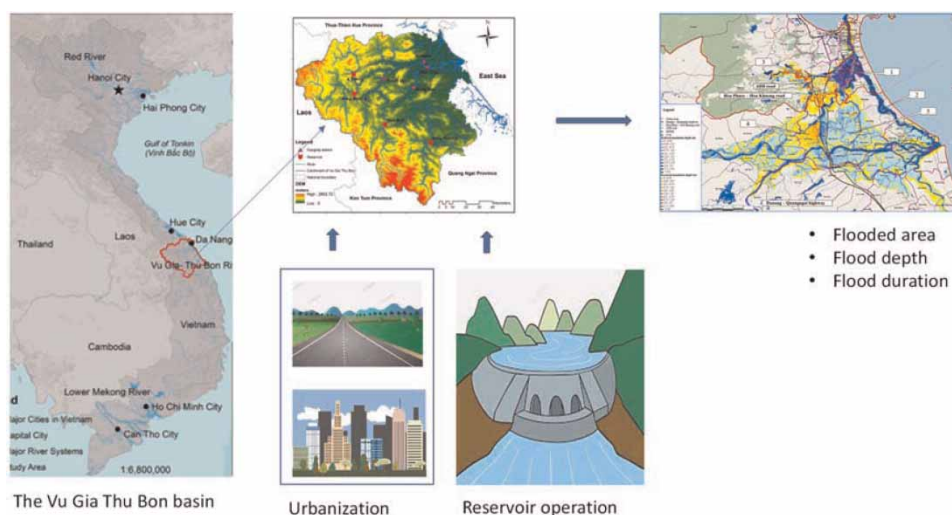

## INTRODUCTION

Flooding is one of the most common natural disasters occurring in the world and its frequency is often higher than that of other disasters. According to recent estimates, flood-related economic losses account for 40% of the overall loss due to all natural disasters (Lyu *et al.* 2020). One of the factors affecting inundation is the process of urbanization. Urbanization has a major impact on flooding, such as increasing flow rates and widening flood peaks (Grove *et al.* 2001; Weng 2001; Li & Wang 2009). Miller & Hutchins (2017) conducted a comprehensive review of the impact of urbanization on flooding, focusing on case studies conducted in the United Kingdom. Generally, four methodologies have been used in order to assess flood inundation: (1) the historical data-based method (Adikari *et al.* 2010), (2) the index-based method (Chen *et al.* 2015; Waghwalwa & Agnihotri 2019; Lyu *et al.* 2020), (3) the scenario simulation method (Huong & Pathirana 2013; Yin *et al.* 2016; Huang *et al.* 2017; Mei *et al.* 2020), and (4) geographic information system and remote sensing techniques (Suriya & Mudgal 2012; Wang & Xie 2018; Thanh Son *et al.* 2021). It can be seen that the scenario simulation is commonly used to predict flood inundation. Furthermore, simulation is one of the most frequently used tools in analyzing flood inundation related to reservoir systems. The behavior of the study region as well as the operation of the reservoir system are investigated in these simulation models under a variety of variable conditions. Mateo *et al.* (2014) used a combination of hydrological, reservoir management, and hydrodynamic models to assess the effects of reservoir operation on floodplain inundation. Ridolfi *et al.* (2019) investigated the influence of different reservoir operation strategies on flood inundation maps. Each operating strategy is developed based on a specified initial water level in the reservoir and discharge, resulting in varying degrees of flooding. Recently, Cong developed the relationship between the flood-limited water level in the reservoir and the flooded area downstream, proposing an effective flood-limited water level (Vu *et al.* 2021).

Vietnam is known as a flood-prone country as it suffers from an average of 12 storms per year. Statistics of major storms (categories 6 to 12) that hit Vietnam from 1961 to 2014 show an increasing frequency of storms, indicating a higher level of danger of flooding in the future (Luu *et al.* 2015). In central region, the shoreline stretches for 1,200 km and is divided by rivers that originate in the western mountain ranges and flow into the East Sea. Given these conditions, this region often suffers from natural disasters such as storms and floods, causing huge loss of life and property (Tran *et al.* 2008; Chau *et al.* 2015). Total damage caused by various types of natural disasters in Vu Gia Thu Bon basin was estimated at up to 3,500 billion VND in 2009, of which 90% was caused by floods (Satriagasa *et al.* 2014). Many major flood events occurred in the last 15 years, particularly in 2017 and 2020, when there were multiple floods in a single year. The floods claimed many lives and destroyed a lot of property, especially in low-income communities; floods wreaked havoc on crops and homes, leaving many people in poverty.

Flood studies have become increasingly necessary in this basin given the modified topography caused by urbanization. Many urban areas and big routes have been built in this basin serving socio-economic development. Danang, in particular,

is one of Vietnam's key economic cities, located in the lower part of the Vu Gia Thu Bon river basin, and Danang has experienced rapid urbanization in recent years (Do *et al.* 2013). According to statistics in 2018, while the population growth rate in Vietnam's metropolitan areas is 34.75%, it is 84.11% in Danang. The leveling of flood drainage areas to form residential areas along with new roads can impede the floodways, leading to a change in flood inundation distribution patterns and a significant increase in flood levels in the surrounding areas.

Structural and non-structural measures can be applied to manage and mitigate the consequences of floods. Changing the operation procedures of the existing upstream reservoirs can be considered the most effective approach to reduce downstream flooding. It is therefore essential to analyze different reservoir operation scenarios to find out which ones are best for flood control. It is also critical in aiding the current government-promulgated inter-reservoir procedure, which has been shown to have limitations (Le *et al.* 2021). In addition to reducing flood flows via reservoir operation, it is critical to improve flood preparedness. A necessary tool for this is an inundation map, which can help determine the extent and depth of flooded areas as well as the flood flow direction. It's also a valuable resource for planners looking to identify high-risk areas, evaluate the performance of various adaptation strategies, or put measures in place to mitigate hazards. In the past, there were several studies on flood mapping for the Vu Gia Thu Bon river basin. Nguyen Hoang Son studied and developed flood maps for the Vu Gia Thu Bon rivers in 2004 and 2009 (Nguyen 2014). Another study on flood mapping of the lower Vu Gia Thu Bon river basin was conducted by Tran (2013). However, these studies have become out of date due to the construction of major traffic routes passing through the basin. Construction of the Danang–Quangngai expressway, for example, began in 2013 and was completed in 2018, which is expected to have significant impacts on inundation. In 2013, Do also investigated urbanization and changes in flood risks in Danang, which is located downstream of the Vu Gia Thu Bon basin (Do *et al.* 2013). The most recent is a study conducted in 2019 by To on the impact of urbanization on flooding in Danang City (To *et al.* 2019). Despite the fact that these studies were recently conducted, they all focused on the impact of urbanization in Danang City, a small section of the Vu Gia Thu Bon river basin. None of these previous studies investigated and discussed the effects of reservoir operation on flood inundation, or on an entire basin. Therefore, it is essential to conduct new flood effect studies in alignment with the upstream reservoir operation and the recent modified topography caused by urbanization for this basin.

In this study, reservoir operation strategies and impacts of urbanization on inundation will be analyzed. The reservoir operation scenarios are developed based on two groups, including the current inter-reservoir operation procedures, and the operations according to the flood storage capacity ( $V_{pi}$ ) of 10, 20, and 30% of the active storage capacity ( $V_{hi}$ ). These operations scenarios lead to different releases, resulting in different impacts on inundation. The respective urbanization scenarios are simulated with the terrain in 2009 and compared with the terrain in 2020. The flood event selected for simulation is the 2009 flood.

## STUDY AREA

With a catchment area of 10,350 km<sup>2</sup>, the Vu Gia Thu Bon river basin is one of the largest in central Vietnam (see Figure 1). The basin is formed by two major rivers named Vu Gia and Thu Bon. The two rivers are connected by the Quang Hue river, which has a significant impact on the downstream flow distribution. Furthermore, the downstream river network is linked by numerous tiny rivers and flows into the sea through the estuaries of Song Han, Cua Dai, and Cua Lo, forming a relatively complex hydraulic regime.

This basin is characterized by the highest rainfall in the country. The rainy season lasts from September to December. The average annual rainfall in the basin's highlands is about 3,000–4,000 mm. Approximately 60–76% of the annual rainfall received during the rainy season is the result of hurricanes and storms that cause flooding (Ho & Umitsu 2011). The number of severe floods caused by storms or tropical depressions combined with high rainfall accounted for 49% of the total flood events. According to statistics, the Vu Gia Thu Bon river basin is the most affected by storms and tropical depressions in Vietnam, with about 16% of the total number of storms and tropical depressions entering and directly affecting the basin (Vân 2015).

In this area, overflow of major rivers and tributaries primarily cause flooding, particularly near tributary outlets during peak flood periods. According to statistics, flood catastrophes have severely impacted people in the area throughout the years, with no signs of abating (Satriagasa *et al.* 2014; Luu *et al.* 2015). Since 2010 floods have killed 601 people, collapsed and damaged over 584,000 houses, reservoirs, dams, bridges, and traffic culverts. The total estimated damage is nearly 24,000 billion VND (NDPC 2020). In this case, upstream hydropower reservoirs play a very important role to mitigate the flood impacts. There are four annual regulating reservoirs, including A Vuong, Song Tranh 2, Song Bung 4, and Dak Mi 4. Besides their power

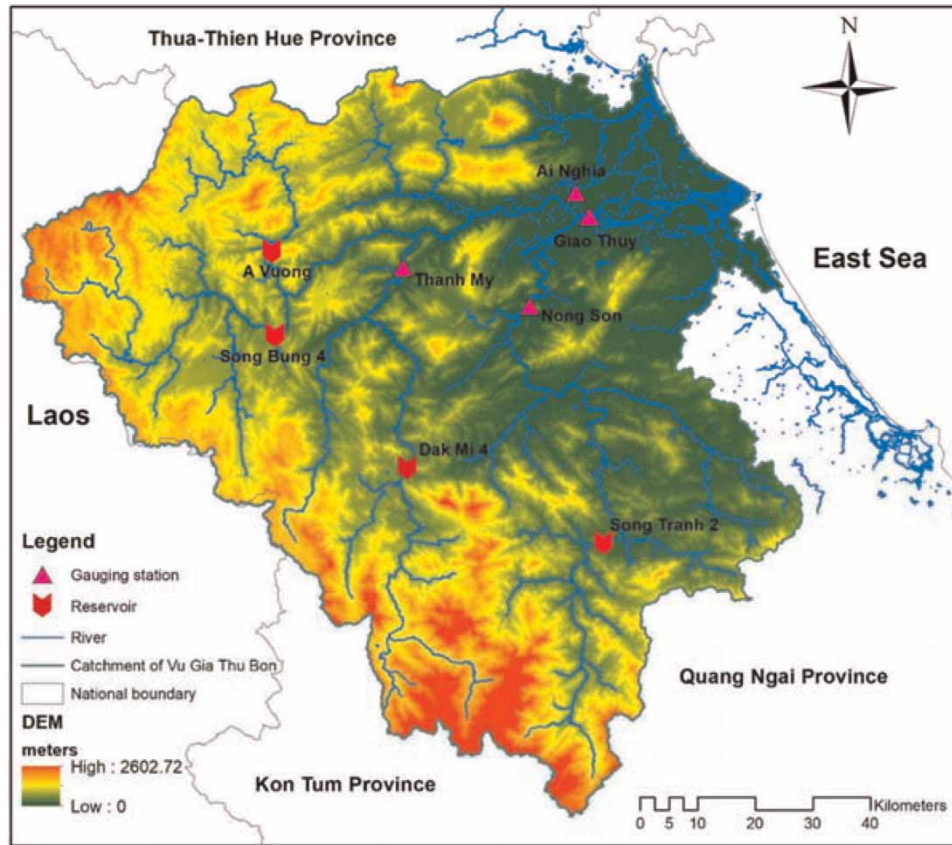

**Figure 1** | The study area.

generation purpose, these reservoirs are assigned with the task of flood control for the basin, so they were chosen for the simulations. These four reservoirs also have the largest power generation capacity. The installed capacities of A Vuong, Song Tranh 2, Song Bung 4, and Dak Mi 4 hydropower plants are 210, 190, 156, and 148 megawatts (MW) respectively. Specifications of the reservoirs are presented in [Table 1](#).

In addition, the basin's topography has experienced important changes from 2009 to the present. Many low-lying areas and flood drainage areas were leveled to construct new urban areas because of rapid urbanization. New urban areas, such as Hoa Xuan, Cam Le, Dong No as well as urban areas along the Co Co river, had been established. Several major roads including the Danang–Quangngai highway, the ADB, and the Hoa Phuoc–Hoa Khuong roads have additionally been built to support socio-economic development. The locations of these urban areas and roads are shown in [Figure 2](#). In particular, a part of the

**Table 1** | Specifications of the large reservoirs in the Vu Gia Thu Bon basin

| Item                           | Unit                           | A Vuong      | Song Tranh 2  | Dak Mi 4     | Song Bung 4  |
|--------------------------------|--------------------------------|--------------|---------------|--------------|--------------|
| Location                       |                                | Vu Gia river | Thu Bon river | Vu Gia river | Vu Gia river |
| Catchment area                 | km <sup>2</sup>                | 682          | 1100          | 1125         | 1448         |
| Mean annual flow               | m <sup>3</sup> /s              | 39.8         | 114           | 67.8         | 73.7         |
| Total storage                  | 10 <sup>6</sup> m <sup>3</sup> | 343.6        | 729.2         | 312.38       | 510.8        |
| Retention water level          | m                              | 380          | 175           | 258          | 222.5        |
| Dead water level               | m                              | 340          | 140           | 240          | 205          |
| Total turbine design discharge | m <sup>3</sup> /s              | 78.4         | 209.7         | 121          | 172.7        |
| Installed capacity             | MW                             | 210          | 190           | 148          | 156          |



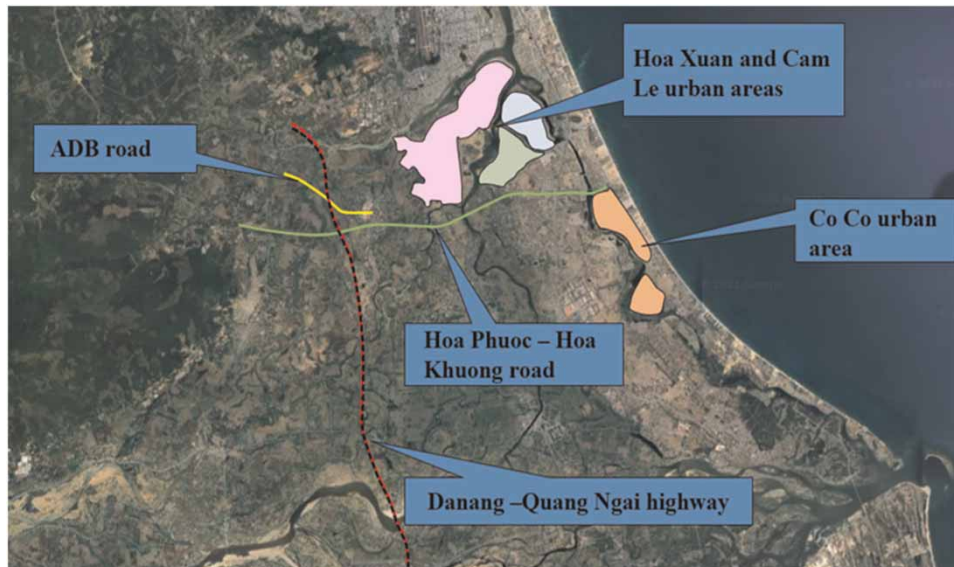

**Figure 2** | A map showing the location of new roads and urban areas.

Co Co river that has been dredged (2020) will have a significant impact on flood drainage. In this study, these changes were updated and evaluated.

## METHODOLOGY AND DATABASES

Numerical models were used, including the MIKE NAM, HEC-ResSim, and the MIKE FLOOD models. Figure 3 depicts a diagram of research application models.

The river network of the Vu Gia Thu Bon river basin is quite complicated and there are only a few monitoring stations in the basin (see Figure 4). There are two hydrological stations, Nong Son station on the Thu Bon river and Thanh My station on the Vu Gia river, providing flow data measured since 1976. Therefore, some boundaries in the river basin where there is no measured data were reconstructed using the MIKE NAM hydrological model, supported by data measured since 1980 from 17 rain gauge stations and 3 other meteorological stations (Firoz *et al.* 2018).

The HEC-ResSim model was used to simulate different reservoir operation scenarios. Each regulation strategy is a combination of the flow discharge and the initial water level in the reservoir. The outputs of the operating scenarios were then

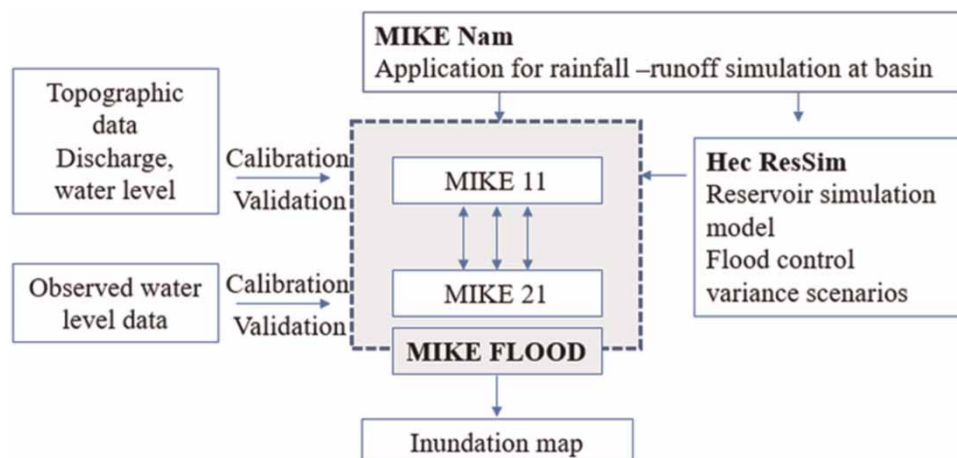

**Figure 3** | The diagram of research application models.



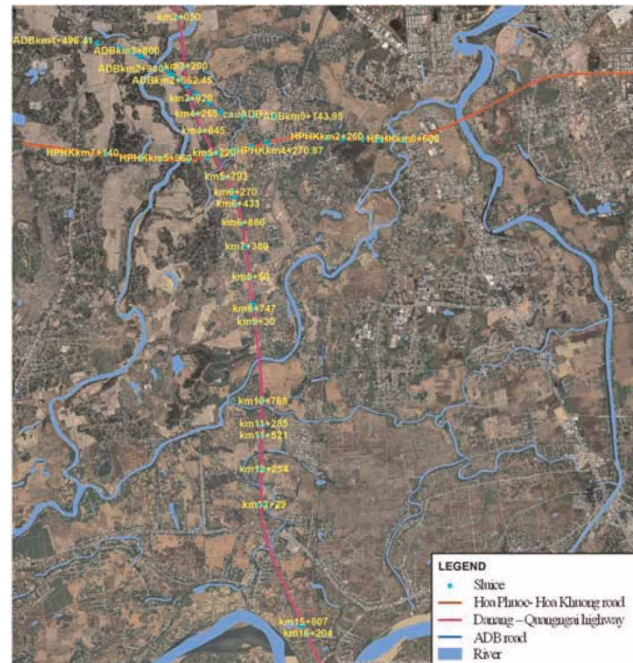

**Figure 5** | The location of the sluices on the major roads.

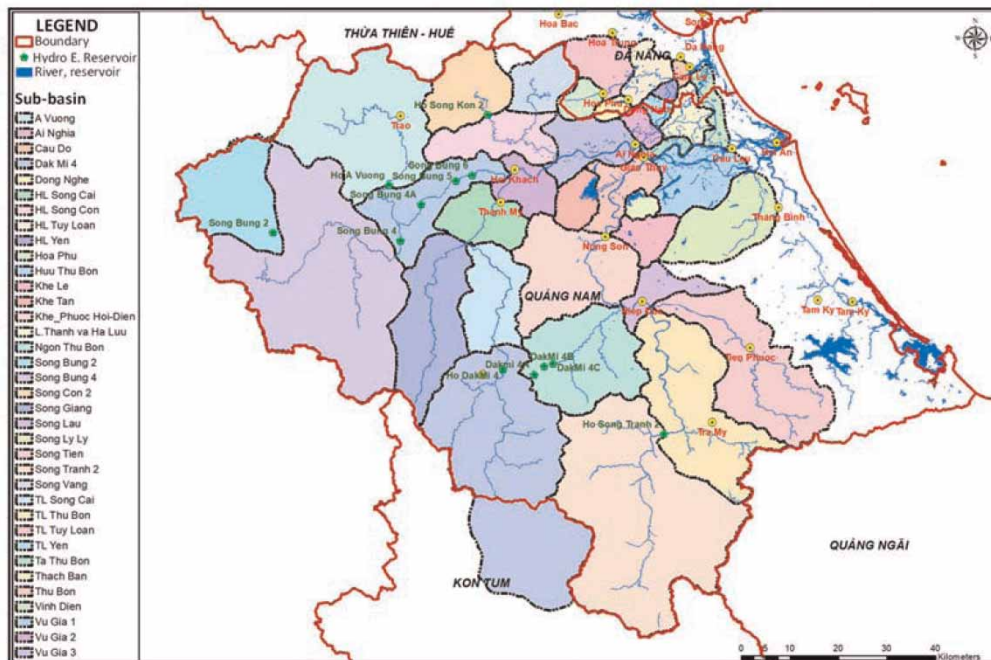

**Figure 6** | The sub-basins in the study area.

At Nong Son station, the calibration results for the 2009 flood event show that the simulated values are closely matched with the measured data. The peak and simulated flows were also in close agreement along with their timings. The Nash and correlation coefficients are 0.974 and 0.988, respectively. At Thanh My station, the observed discharge values are slightly higher than the simulated ones. The Nash and correlation coefficients are 0.83 and 0.96, respectively.

The calibration results for the 2007 flood event at the two stations above show that the simulated flow is fairly close to the measured one. The times to peak for the calibration data show a lag of about a couple of hours. The Nash and correlation



**Table 2** | The coefficients  $k$  and  $x$  in the Muskingum method

| No. | River sections               | $K$  | $x$  |
|-----|------------------------------|------|------|
| 1   | Tranh 2 river – Truong river | 0.8  | 0.25 |
| 2   | Truong river – Tum river     | 2.2  | 0.25 |
| 3   | Tum river – Tien river       | 1.4  | 0.25 |
| 4   | Tien river – Trau river      | 0.7  | 0.25 |
| 5   | Trau river – Trieng river    | 0.6  | 0.25 |
| 6   | Trieng river – X river       | 1.0  | 0.25 |
| 7   | X river – Dien Ne river      | 0.7  | 0.25 |
| 8   | Dien Ne river – Nong Son     | 0.7  | 0.25 |
| 9   | Dak Mi 4 – Giang river       | 1.5  | 0.25 |
| 10  | Giang river – Thanh My       | 1.0  | 0.25 |
| 11  | Bung 2 river – SBN2          | 1.0  | 0.25 |
| 12  | SBN2 – SBN3                  | 0.22 | 0.25 |
| 13  | SBN3- Bung 4 river           | 0.25 | 0.25 |
| 14  | Bung 4 river+A Vuong – LV3   | 2.0  | 0.25 |
| 15  | Thanh My +LV3- Hoi Khach     | 2.0  | 0.25 |

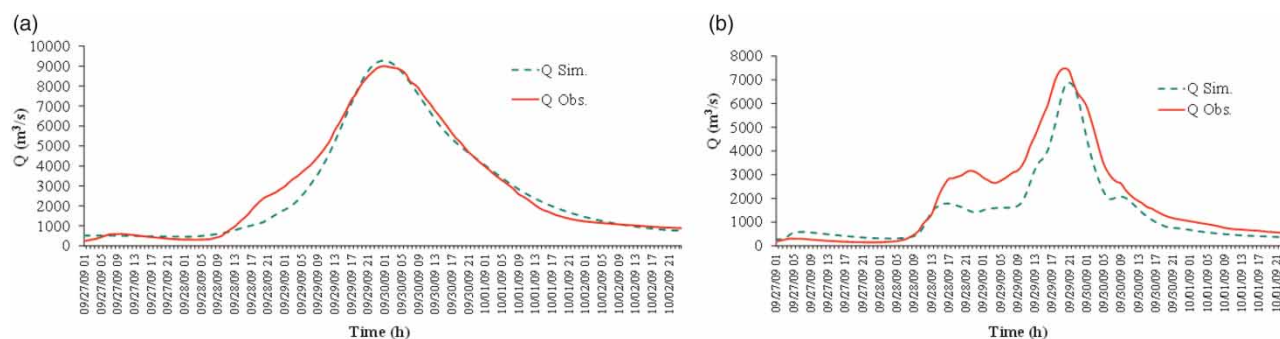**Figure 7** | Calibration of flow in the 2009 flood event at (a) Nong Son, and (b) Thanh My stations.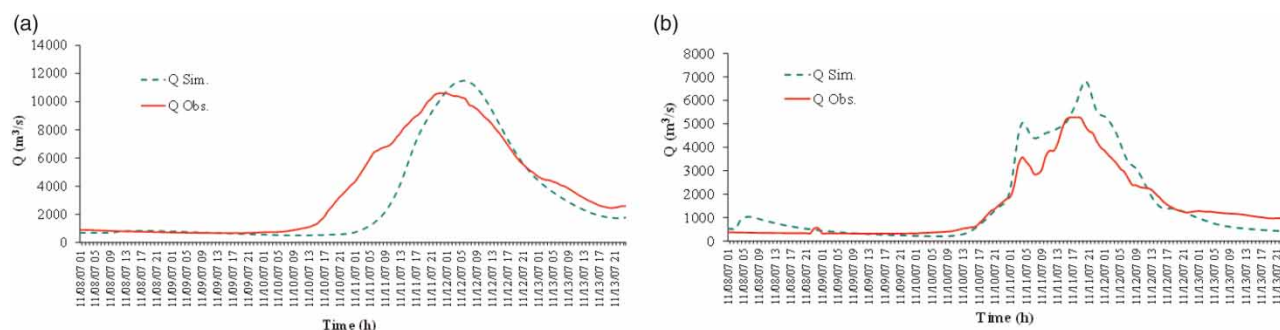**Figure 8** | Validation of flow in the 2007 flood event at (a) Nong Son, and (b) Thanh My stations.

coefficients at Nong Son station are 0.77 and 0.91, respectively. These two coefficients are 0.8 and 0.98 at Thanh My station, respectively. The obtained Nash coefficients and correlation coefficients are at a good level, according to [Moriassi et al. \(2007\)](#) hierarchy. Because of these calibration and validation performances, this set of parameters was used to simulate the inflow to



the Vu Gia Thu Bon sub-basins, then providing boundary values to simulate the reservoir operations and flooding in river basins.

### HEC-ResSim model

The HEC-ResSim model was validated at Nong Son and Thanh My stations for the 2009 flood event, as shown in Figure 9. There is reasonable consistency between the observed and simulated discharges at Nong Son station, whereas there is a slight difference in the time of peak at Thanh My station. The Nash coefficients at the stations are 0.945 and 0.85, respectively. The correlation coefficients are 0.973 and 0.93, respectively. The percentage errors in peak flow at two stations are 3.14% and 1.27%, respectively. These results indicate that the model works reasonably well during validation.

### MIKE Flood model

The MIKE 11 and MIKE 21 models were linked together using lateral linkages to form the MIKE FLOOD model, which was used to simulate two-dimensional flood inundations. Whenever overflow occurs in MIKE-11, MIKE-21 calculates the overflow through each cell using the weir formula. The inundation extent and depth of flood for overflow were calculated using MIKE-21 (Kadam & Sen 2012). The MIKE FLOOD model was calibrated and validated for the flood events in 2009 and 2007, respectively. The water levels measured at Hoi Khach, Ai Nghia, and Giao Thuy stations were used to calibrate and validate the model. Figures 10 and 11 and Table 3 show the results of calibration and validation.

The calibration results show a good agreement between the simulated line shape and the measured line shape except for a slight difference that occurs during the recession. However, the peak water level is preserved at the stations, which is crucial in flood modeling studies (Patro *et al.* 2009). The Nash coefficients vary in the range of 0.765 to 0.785, while the  $R^2$  coefficients vary from 0.967 to 0.993. The percentage errors in peak flow at the three stations are less than around 2.5%.

For validation performance, it is observed from Figure 11 that there is a reasonably good agreement between the observed and simulated discharges at Ai Nghia and Giao Thuy stations, whereas at Hoi Khach station there is a slight difference during the recession. The Nash coefficients were found in the range of 0.89 to 0.98, and the correlation coefficient is greater than 0.97 for all the three stations. The percentage error in peak flow is small, ranging from 0.34% to 1.5%.

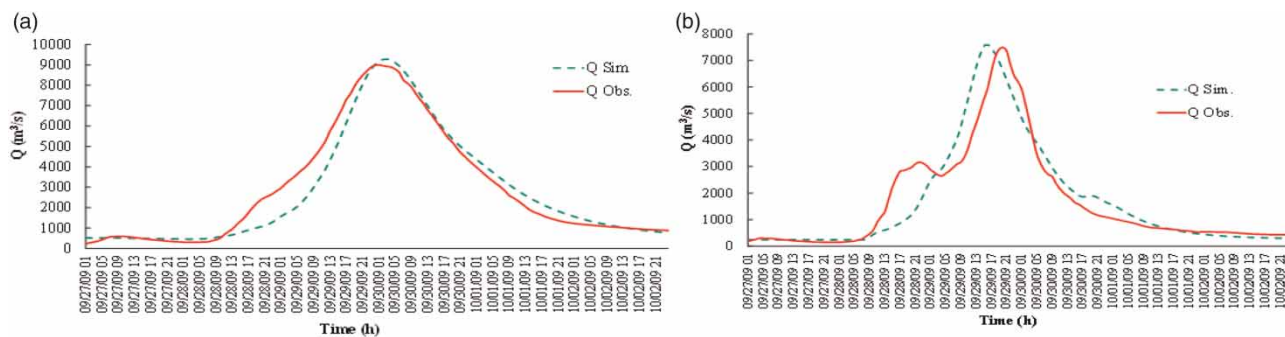

**Figure 9** | Validation of flow in the 2009 flood event at (a) Nong Son, and (b) Thanh My stations (HEC ResSim model).

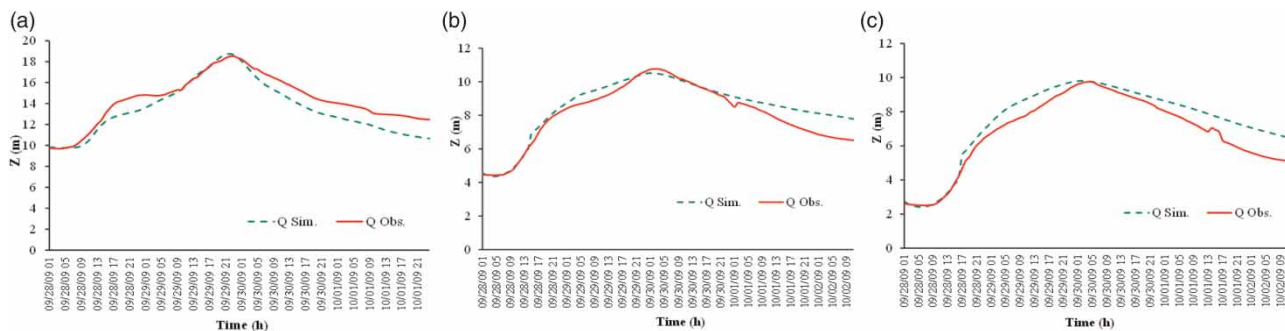

**Figure 10** | Calibration of water level in the 2009 flood event at (a) Hoi Khach, (b) Ai Nghia, and (c) Giao Thuy stations (MIKE FLOOD model).

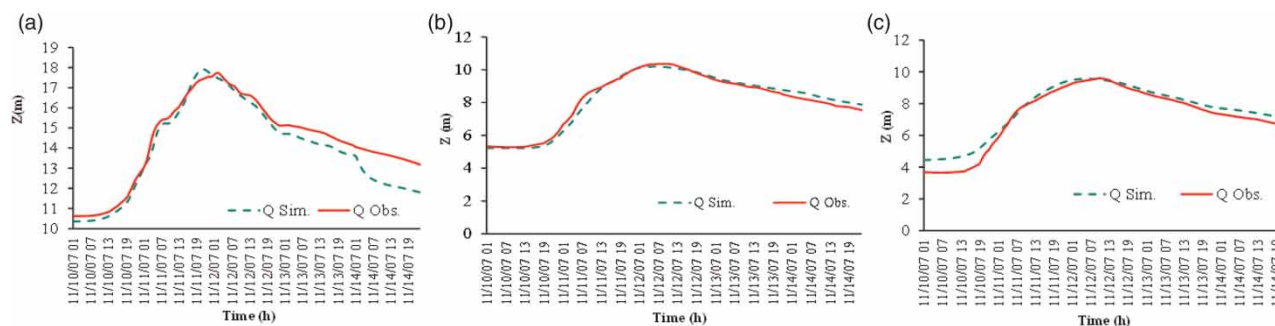

**Figure 11** | Validation of water level in the 2009 flood event at (a) Hoi Khach, (b) Ai Nghia, and (c) Giao Thuy stations (MIKE FLOOD model).

**Table 3** | Statistics of the peak water level value in calibration and validation

| Station   | Flood event | Peak water level Obs. (m) | Peak water level Sim. (m) | Error (m) |
|-----------|-------------|---------------------------|---------------------------|-----------|
| Hoi Khach | 2009        | 18.53                     | 18.75                     | 0.22      |
|           | 2007        | 17.74                     | 17.93                     | 0.19      |
| Ai Nghia  | 2009        | 10.77                     | 10.51                     | 0.26      |
|           | 2007        | 10.36                     | 10.20                     | 0.16      |
| Giao Thuy | 2009        | 9.75                      | 9.81                      | 0.06      |
|           | 2007        | 9.60                      | 9.57                      | 0.03      |

The MIKE Flood model was additionally validated using investigation of flood traces obtained during the flood event in 2009 (22 values). The locations of flood traces are depicted in Figure 12. The simulated and observed flood traces are shown in Figure 13. Most of the flood traces closely followed the simulation results, but there are also some locations with a difference of 0.5 m (locations of 1, 5, 7, and 12). It should be noted that these flood traces have not only been recorded on flood warning columns (high accuracy), but also several flood traces have been obtained through surveys of living people (low certainty). Large disparities in some locations can be attributed to the above-mentioned data. In general, the calibration and validation results are very well demonstrated through the measurement data recorded at the measuring stations as described above, indicating that the model is reliable.

### Simulated scenarios

In order to assess the extent of inundation changes due to different operating modes of upstream hydropower plants and urbanization, different scenarios were defined as shown in Table 4.

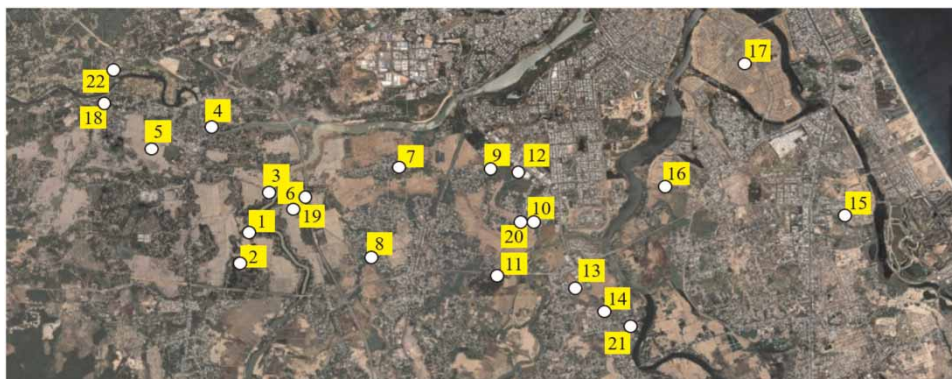

**Figure 12** | Location of flood traces of 2009 flood event.

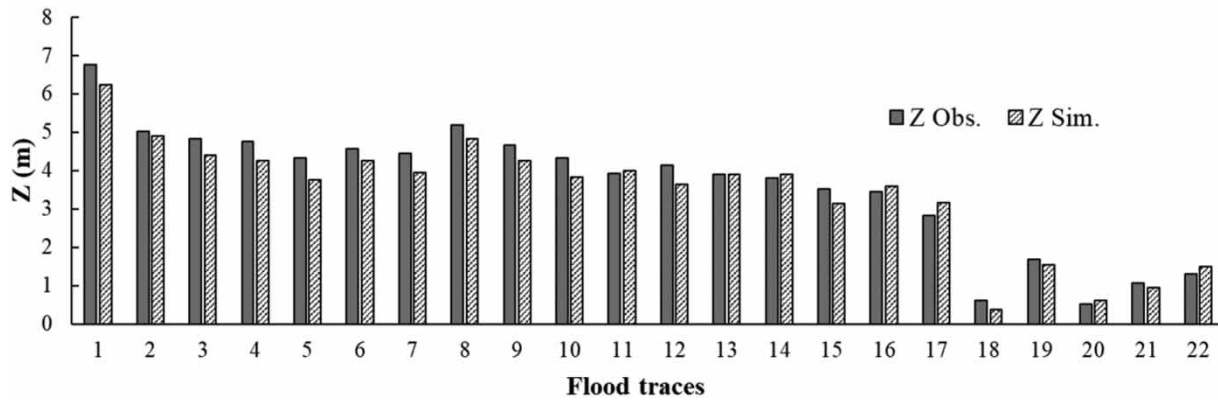

**Figure 13** | Comparison of flood traces and simulation results for 2009 flood event.

**Table 4** | Simulated scenarios

| No. | Scenario | DEM  | Reservoir operation                      |
|-----|----------|------|------------------------------------------|
| 1   | KB1A     | 2009 | No                                       |
| 2   | KB1B     | 2009 | Yes, inter-reservoir operation procedure |
| 3   | KB2A     | 2020 | No                                       |
| 4   | KB2B     | 2020 | Yes, inter-reservoir operation procedure |
| 5   | KB3A     | 2020 | Yes, $V_{pl}=10\% V_{hi}$                |
| 6   | KB3B     | 2020 | Yes, $V_{pl}=20\% V_{hi}$                |
| 7   | KB3C     | 2020 | Yes, $V_{pl}=30\% V_{hi}$                |

Table 4 shows two categories of reservoir regulation that are simulated and analyzed. In category 1 (scenarios KB1B, KB2B) the reservoirs are regulated pursuant to the present inter-reservoir procedure. It should also be noted that the regulations according to category 1 have the following characteristics: (1) the initial water level is equal to the retention water level; (2) in the 24 hours before the flood peaks occur, the release starts to increase to offer adequate storage to prevent floods. In category 2, the scenarios KB3A, KB3B, and KB3C were determined according to the  $V_{pl}$  of 10, 20, and 30% of the  $V_{hi}$ , respectively.

Figure 14 shows different operation scenarios of the four reservoirs in the basin. In scenarios KB3A, KB3B, and KB3C, the flood-limited water levels are maintained at different levels, corresponding to the  $V_{pl}$  of 10%, 20%, 30% of the  $V_{hi}$ . This water level is kept constant before the flood arrives, or in other words, during this time the release is equal to the inflow. When the flood arrives, the release will increase but still be much smaller than the peak flood discharge to ensure flood reduction for downstream. The release will be largest in scenario KB3A and decrease in scenarios KB3B and KB3C. For the KB2B scenario, the reservoirs are required to release earlier to lower the water level and create room to catch floods.

Figure 15 depicts the flow variance at Nong Son and Thanh My stations, corresponding to the above regulation strategies. It can be seen that the reservoirs have significantly reduced peak flood. In scenario KB2B, the flood peak discharge decreases from around 9,200  $m^3/s$  to around 7,800  $m^3/s$ , equivalent to a decrease of 15.2% at Nong Son station. At Thanh My station, the flood peak discharge decreases by 28% for scenario KB2B. The study also shows that the flows at Nong Son station are equal in scenarios KB2B and KB3B.

## RESULTS AND DISCUSSION

The impacts of reservoir operation and urbanization on flooding are shown via the inundation maps (see Figures 16–20). These maps are developed based on the superposition of inundation maps between the simulation scenarios. They show where the areas of increased or decreased inundation depth are located. The areas with reduced inundation depth are

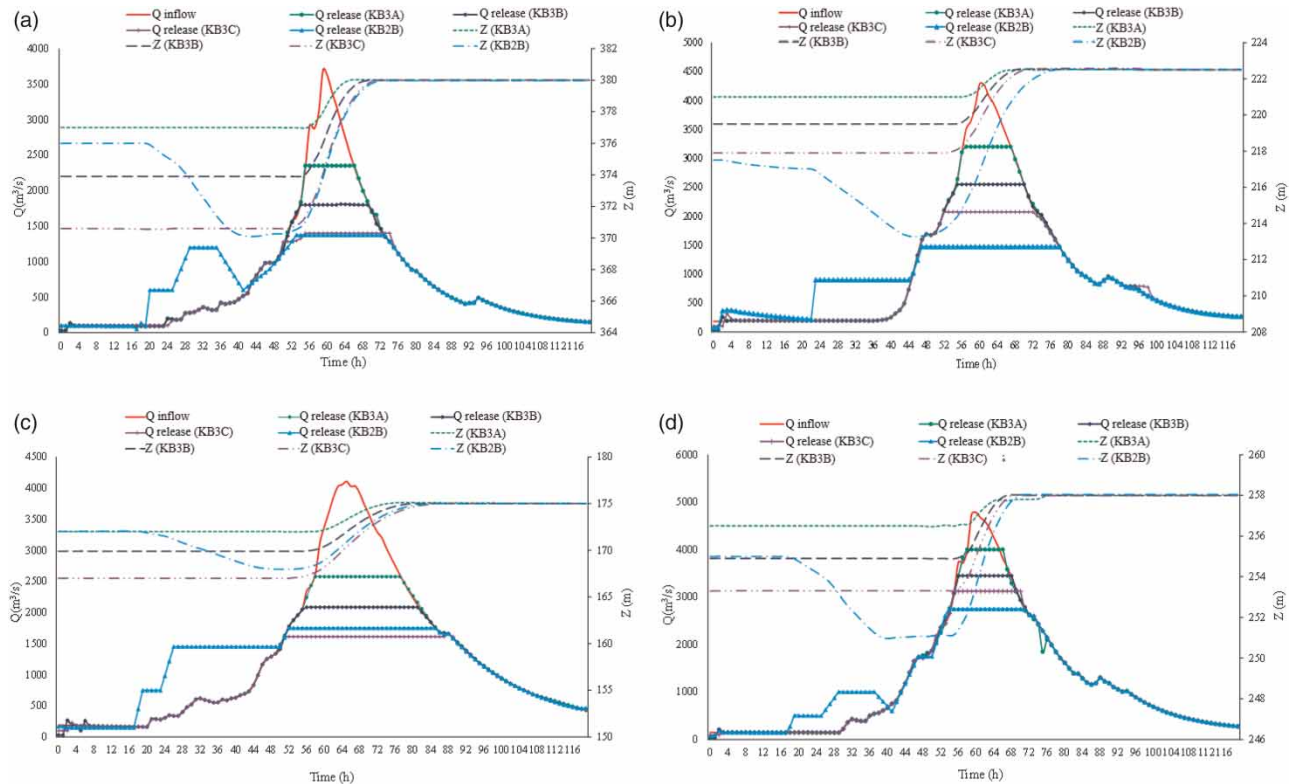

**Figure 14** | The discharge and water level time series at the reservoirs under different operation scenarios (a) A Vuong, (b) Song Bung4, (c) Song Tranh 2, and (d) Dak Mi 4 reservoirs.

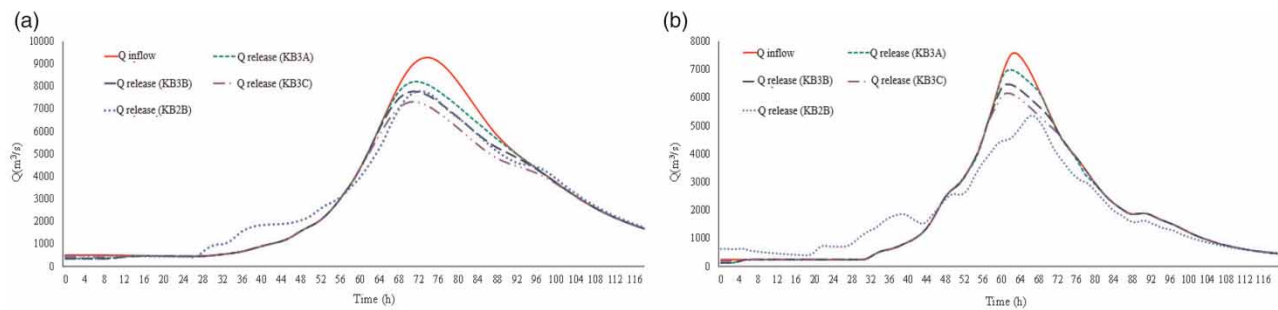

**Figure 15** | Discharge time series at (a) Nong Son, and (b) Thanh My stations.

shown in blue, while the areas with increased inundation depth are shown in yellow or red. The flooded areas with increased or decreased inundation depth are also listed in [Tables 5–7](#).

### Impact of reservoir operation scenarios on flooding

[Figure 16](#) shows the flood results when comparing the two scenarios (KB2A and KB2B). In the absence of a regulating reservoir, the upstream boundary is a natural flow, so it will cause large-scale flooding. When there are regulating reservoirs, the flow to downstream is reduced, resulting in a deep reduction in inundation. [Figure 16](#) shows that the flooding has decreased in most areas, and there has been no increase in flooding in any location. The areas with reduced inundation depth appear in many places, with the reduction of 0–0.2 m predominantly. Areas with inundation reductions of 0–1 m account for 537.74 km<sup>2</sup> (see [Table 5](#)). Areas with a reduced inundation depth of more than 1 m account for 3.16 km<sup>2</sup> and are concentrated in Area 1. This area is frequently inundated by river overflowing due to its low topography and twisting and shallow river segment, which leads to inadequate drainage capacity.



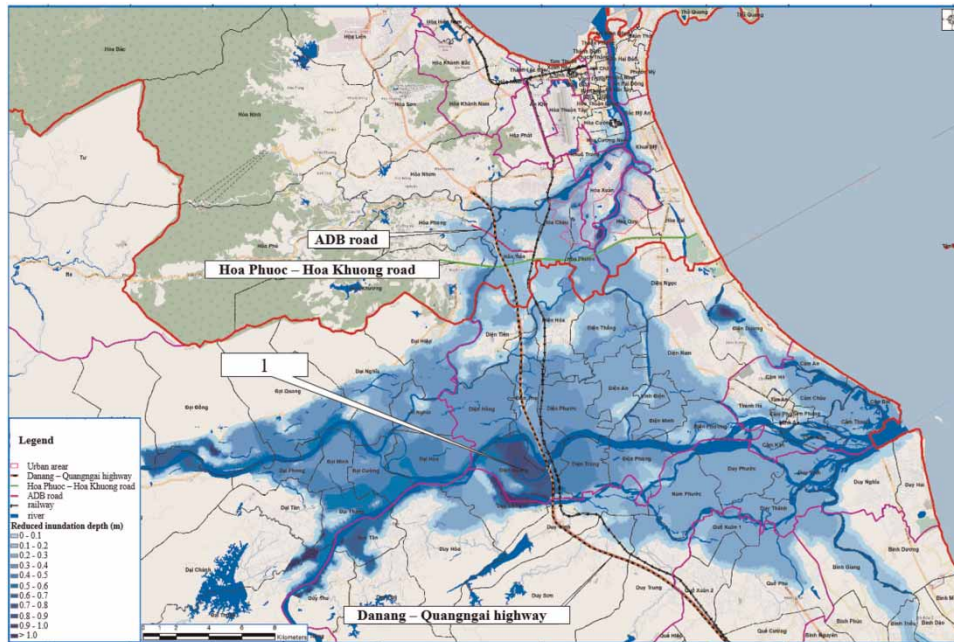

**Figure 16** | Map showing locations with increased and decreased inundation depth (results of comparison between the two scenarios KB2A and KB2B).

### Impact of urbanization scenarios on flooding

Figure 17 shows the inundation variation due to topographic change when comparing the two scenarios (KB2B and KB1B). The statistics on the surface area corresponding to the variation in inundation depth are presented in Table 6. The results show that there is a large variation in the extent and depth of inundation. The zones with largely reduced flood depth are typically found on the right side of the highway (Areas 1, 2, and 5), of which, the areas with flood depths reduced by

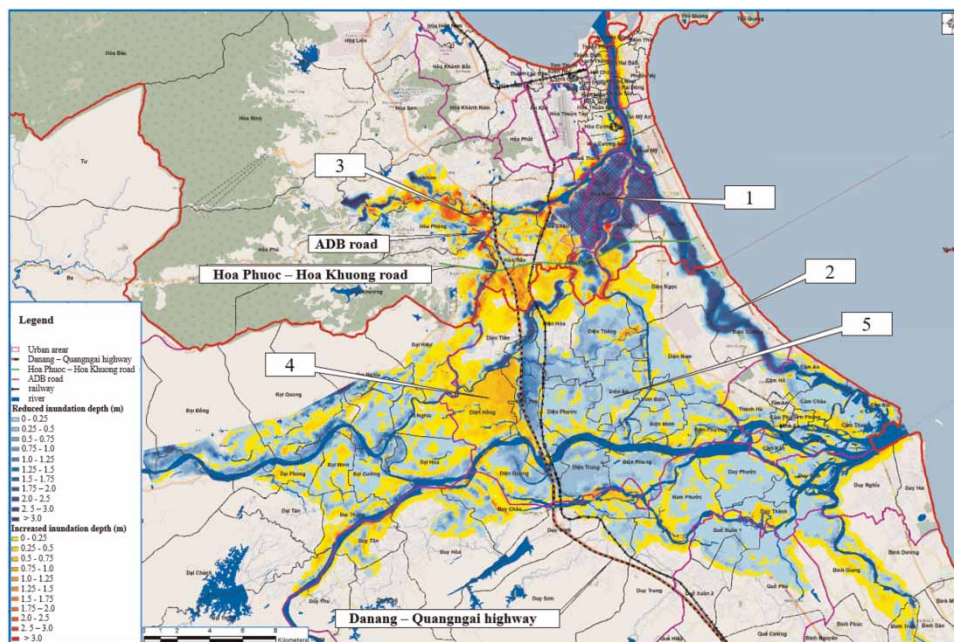

**Figure 17** | Map showing locations with increasing and decreasing inundation depth (results of comparison between two scenarios KB2B and KB1B).

0–0.5 m cover 233.19 km<sup>2</sup>, which occurs mainly around Area 5. The area with the flood depth reduced by more than 2 m, accounting for 26.62 km<sup>2</sup>, is found mainly in Areas 1 and 2. This area has now higher terrain due to urbanization and the construction of urban areas such as the Hoa Xuan urban area and the Co Co riverside urban area. This explains why the flood depth in this area is significantly reduced. In contrast to the zones with flood reduction, the areas facing increased flooding are primarily found on the left side of the highway, in Area 4.

Furthermore, in Area 3 where Hoa Phuoc and ADB roads intersect the expressway, the flood level rises on both sides of the expressway. The inundation increased by more than 3 m in Area 3 and may be due to urbanization in Area 1, where the low-lying areas are now leveled. Because of the elevated topography, flood flow into the Cam Le – Han river has been blocked, creating local water-logging in this area. The above simulation results are completely consistent with reality and the experts' opinions at a workshop in Danang on reducing the risk of flooding due to urbanization when they stated that leveling in the flood drainage area (Area 1) has obstructed water drainage, significantly increasing flood levels in neighboring low-lying communes (Tran 2015). From the above analysis, it is shown that building urban areas with raised foundations will most likely prevent flooding for those urban areas, but may also flood other areas. Obviously, this is a problem that needs to be analyzed overall, including the surrounding areas, to choose an appropriate flood control frequency for all areas. This study will be the basis for policy decisions on smart urban planning in Quang Nam province and Danang City.

In addition to the impact of urban areas, road construction has resulted in a significant change in flood distribution. These roads restrict the flow, resulting in severe flooding on one side and a drastic drop on the other side, as shown in Area 4. The flood depth on the left side of the expressway increased by about 1 m, while it decreased by about 1 m on the right side; the water level difference between the two sides of the road was about 2 m. In Area 3 (the area adjacent to Hoa Phuoc–Hoa Khuong road and ADB road), the increase in flood depth also differs markedly between the two sides of the road.

### Impacts of $V_{pl}$ scenarios on flooding

The effects of various operation scenarios for different  $V_{pl}$  (KB3A, KB3B, and KB3C scenarios) are shown in Figures 18–20. Statistics on the flooded area and flood depth are shown in Table 7. As  $V_{pl}$  increases, the reservoir's storage capacity during floods will increase, reducing downstream flooding. When comparing the inundation maps of all three scenarios (KB3A, KB3B, and KB3C), it is clear that several areas, such as Areas 1, 2, and 3, have changed from flooded to non-flooded. Besides, many areas also have inundation depth reductions. Table 7 shows that in scenario KB3C the flooded area is the smallest, which covers 488.05 km<sup>2</sup> or 4.72% of the basin's total area. The flooded area reduces from 553.11 km<sup>2</sup> to 488.05 km<sup>2</sup> (decrease by 11.8%) as  $V_{pl}$  increased from 10% to 30% of the  $V_{hi}$ .

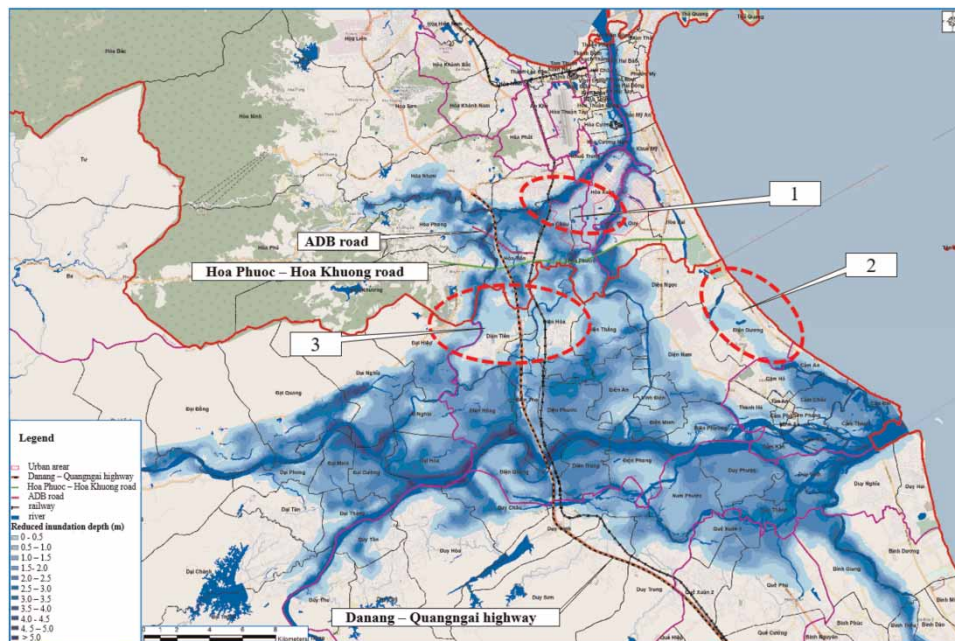

**Figure 18** | Flood inundation map (scenario KB3A).



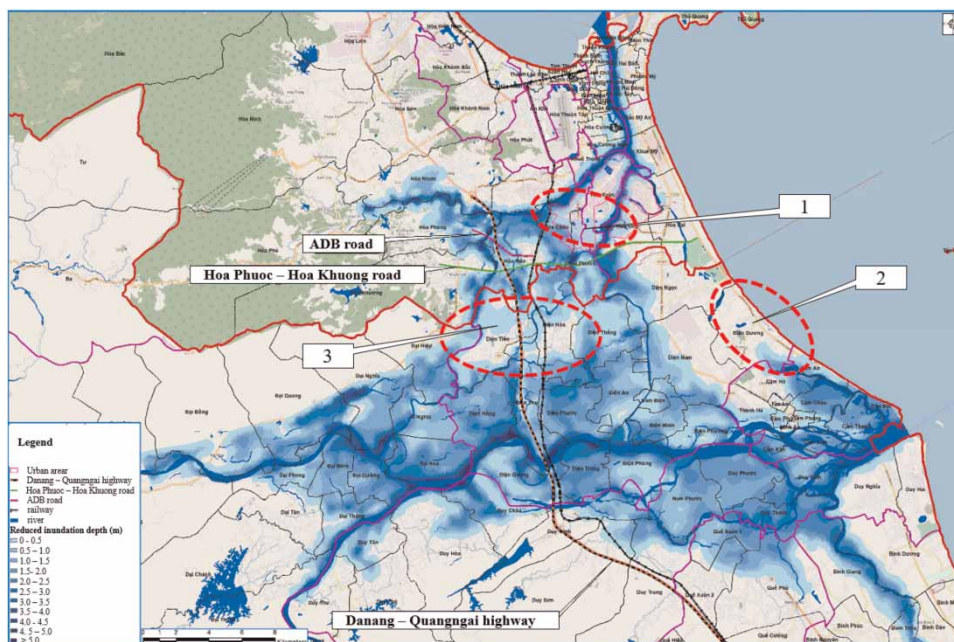

**Figure 19** | Flood inundation map (scenario KB3B).

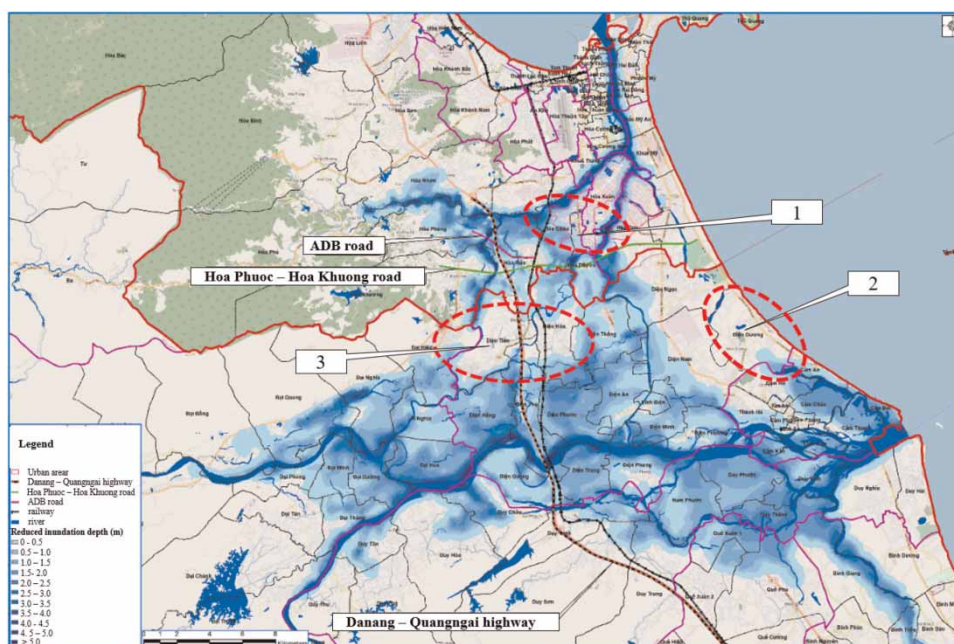

**Figure 20** | Flood inundation map (scenario KB3C).

The area with over 5 m flood depth decreases from 6.65 km<sup>2</sup> (KB3A) to 3.28 km<sup>2</sup> (KB3C), making a decrease of about 50.6%. Meanwhile, the area with a flood depth of 1.5 to 5 m decreases from 255.71 km<sup>2</sup> to 150.62 km<sup>2</sup>, making a decrease of about 41.1%. In many locations, the depth of flooding decreased from more than 1.5 m to less than 1.5 m, which explains why the area with a flood depth of 0–1.5 m in KB3C increased by 14.9% compared to KB3A. Table 7 also shows that areas with inundation depths ranging from 0 to 0.5 are dispersed, accounting for approximately 1.3–1.5% of the total basin area.

**Table 5** | Statistics of areas with reduced inundation depth (KB2A and KB2B)

| Level (m)                       | Area (km <sup>2</sup> ) | Level (m) | Area (km <sup>2</sup> ) |
|---------------------------------|-------------------------|-----------|-------------------------|
| 0–0.1                           | 87.25                   | 0.6–0.7   | 6.39                    |
| 0.1–0.2                         | 69.65                   | 0.7–0.8   | 5.75                    |
| 0.2–0.3                         | 214.16                  | 0.8–0.9   | 4.00                    |
| 0.3–0.4                         | 84.55                   | 0.9–1     | 2.81                    |
| 0.4–0.5                         | 41.78                   | >1        | 3.16                    |
| 0.5–0.6                         | 21.40                   |           |                         |
| Total (km <sup>2</sup> ) 540.88 |                         |           |                         |

**Table 6** | Statistics of areas with reduced and increased inundation depth (KB2B and KB1B)

| Increased                     |                         | Reduced                       |                         |
|-------------------------------|-------------------------|-------------------------------|-------------------------|
| Level (m)                     | Area (km <sup>2</sup> ) | Level (m)                     | Area (km <sup>2</sup> ) |
| 0–0.25                        | 171.58                  | 0–0.25                        | 141.74                  |
| 0.25–0.5                      | 61.61                   | 0.25–0.5                      | 40.61                   |
| 0.5–0.75                      | 25.52                   | 0.5–0.75                      | 21.56                   |
| 0.75–1                        | 14.61                   | 0.75–1                        | 11.70                   |
| 1–1.25                        | 8.78                    | 1–1.25                        | 6.13                    |
| 1.25–1.5                      | 6.14                    | 1.25–1.5                      | 3.99                    |
| 1.5–1.75                      | 5.75                    | 1.5–1.75                      | 3.09                    |
| 1.75–2                        | 6.17                    | 1.75–2                        | 2.14                    |
| 2–2.5                         | 12.56                   | 2–2.5                         | 3.00                    |
| 2.5–3                         | 9.32                    | 2.5–3                         | 1.83                    |
| >3                            | 4.74                    | >3                            | 4.59                    |
| Total area (km <sup>2</sup> ) | 326.79                  | Total area (km <sup>2</sup> ) | 240.37                  |

**Table 7** | Statistics on the inundation area and inundation depth

| Level (m)                     | KB3A   | % <sup>a</sup> | KB3B   | % <sup>a</sup> | KB3C   | % <sup>a</sup> |
|-------------------------------|--------|----------------|--------|----------------|--------|----------------|
| 0–0.5                         | 134.15 | 1.30           | 136.35 | 1.32           | 155.01 | 1.50           |
| 0.5–1                         | 73.86  | 0.71           | 77.25  | 0.75           | 86.34  | 0.83           |
| 1–1.5                         | 82.75  | 0.80           | 88.58  | 0.86           | 92.82  | 0.90           |
| 1.5–2                         | 99.39  | 0.96           | 96.96  | 0.94           | 70.72  | 0.68           |
| 2–2.5                         | 75.73  | 0.73           | 63.58  | 0.61           | 37.63  | 0.36           |
| 2.5–3                         | 37.94  | 0.37           | 31.58  | 0.31           | 16.01  | 0.15           |
| 3–3.5                         | 17.99  | 0.17           | 14.55  | 0.14           | 10.06  | 0.10           |
| 3.5–4                         | 10.36  | 0.10           | 9.49   | 0.09           | 8.13   | 0.08           |
| 4–4.5                         | 8.41   | 0.08           | 7.83   | 0.08           | 5.19   | 0.05           |
| 4.5–5                         | 5.89   | 0.06           | 4.87   | 0.05           | 2.88   | 0.03           |
| > 5                           | 6.65   | 0.06           | 5.47   | 0.05           | 3.28   | 0.03           |
| Total area (km <sup>2</sup> ) | 553.11 | 5.34           | 536.51 | 5.18           | 488.05 | 4.72           |

<sup>a</sup> Inundation area (km<sup>2</sup>)/Total catchment area: 10,350 (km<sup>2</sup>).



### Water level at downstream stations and flooding duration

The changes in water level at Hoi An, Giao Thuy, Cam Le, and Ai Nghia stations under the influence of the above scenarios are shown in Figure 21.

In the scenarios related to urbanization, the construction of roads and residential areas has led to a large change in flood distribution. Many areas are inundated more deeply, while others saw a reduction in flooding. This is also reflected in the water level of the four stations above. Comparing scenarios KB1B and KB2B, it can be seen that the water level drops at Hoi An, Cam Le, and Ai Nghia stations, while it rises at Giao Thuy station.

In the scenarios related to  $V_{pl}$ , increasing  $V_{pl}$  from 10% to 30% of the  $V_{hi}$  (i.e., an increase of about 105.405 million  $m^3$ ) leads to a significant decrease in water levels at the downstream stations. Water levels at Hoi An, Giao Thuy, Cam Le, and Ai Nghia stations decreased by 29.5, 6.4, 21.4, and 6.0%, respectively. It is interesting to notice that when regulating with  $V_{pl}=20\%$  of the  $V_{hi}$  (scenario KB3B) and with the inter-reservoir procedure (scenario KB2B), the water level at downstream stations is similar, thus the downstream flooding is almost the same. In terms of water supply capacity, the inter-reservoir regulation (KB2B) produces better results as the water level in the reservoirs is kept higher, and the possibility of water shortage is, therefore, smaller. However, regulation by the inter-reservoir process requires more accurate forecasts to allow timely discharge before the flood arrives.

Figure 21 also shows the water level exceeding Alarm level III (AL-III) which is the value of the water level regulated by the government (Decision No. 05/2020/QĐ-TTg 2020; Prime Minister 2020). When the water levels are above the Alarm level III, massive floods will happen, putting people's daily lives and livelihoods in jeopardy, as well as endangering their lives and property. The 2009 flood event was a major flood, with the water levels at all stations exceeding Alarm level III and constituting a threat. From Figure 21, it can be seen that the KB3C scenario helps reduce flood the best, even though the water level is still higher than the Alarm level III by 0.03 m and 0.37 m at Hoi An and Giao Thuy stations, respectively, and especially for Ai Nghia station, where the water level exceeds Alarm level III by 1.04 m. In the other scenarios, water levels exceed Alarm level III by 0–1.5 m at the four stations, by 0.74 m, 0.63 m, 0.36 m, and 1.42 m, respectively, in the current inter-reservoir operation scenario (KB2B). In particular, in the case of no reservoirs (scenario KB1A), the water level at the four stations exceed Alarm level III by 1.26 m, 0.85 m, 0.9 m, and 1.93 m, respectively.

The inundation duration is also an important factor in flood analysis. This factor will undoubtedly have a significant impact on plant, animal, and human resilience. It also has a significant impact on the resilience of flood prevention works, particularly earth-filled embankments and dikes, which are common in Vietnam. Figure 22 shows the period when the water levels at the stations remain higher than the Alarm level III (hereinafter referred to as  $T_{BD3}$ ). The longer this period is, the greater the damage. This figure also shows the line graph connecting the average  $T_{BD3}$  values of the stations.

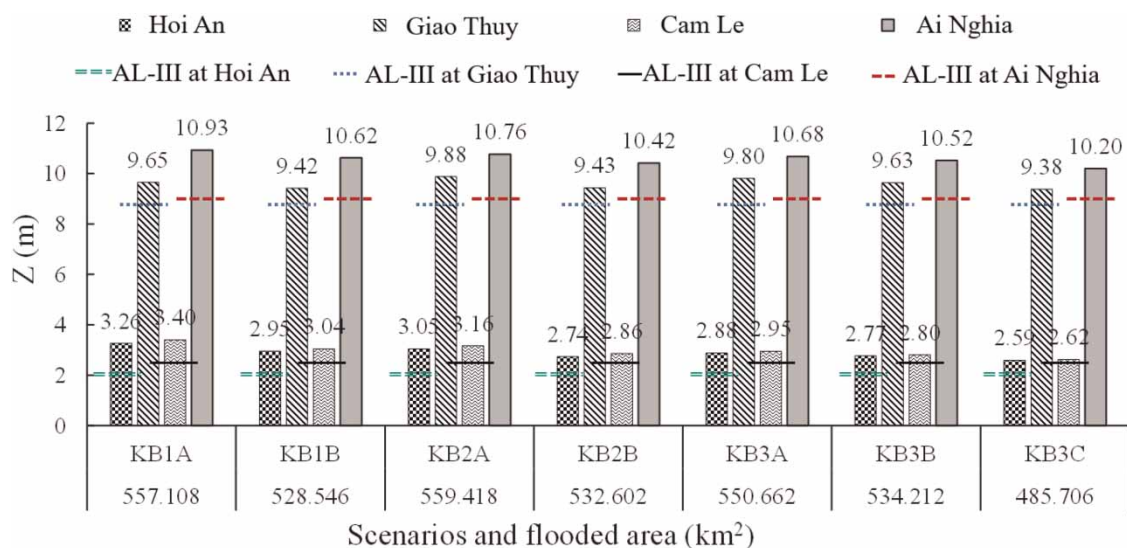

Figure 21 | Water level at the downstream stations corresponding to the simulation scenarios.

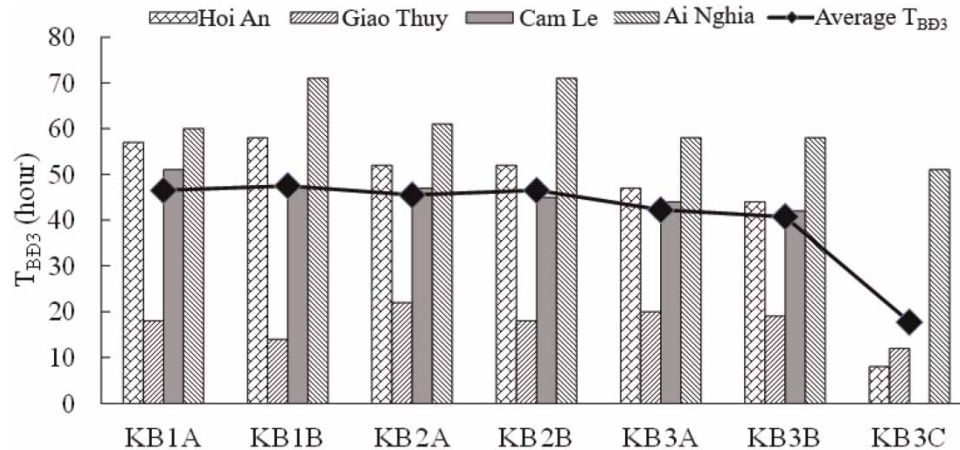

**Figure 22** | Duration of water level exceeding the Alarm level III at the stations.

When increasing  $V_{pl}$  from 10 to 20% or 30% of the  $V_{hi}$  (scenarios KB3A, KB3B, KB3C), the  $T_{BD3}$  decreases dramatically. The water level in scenario KB3C is even lower than the Alarm level III at Cam Le station. Comparison between scenarios KB1B and KB2B reveals that roads and new urban areas have little effect on  $T_{BD3}$  at the stations. This is apparent at the Ai Nghia and Cam Le stations. The average  $T_{BD3}$  value of the stations in the two scenarios above is similar and equal to around 47 hours. Scenario KB2B has a higher  $T_{BD3}$  than scenario KB3B for most stations, except for Giao Thuy. In other words, from the standpoint of flooded duration, scenario KB2B may cause more damage.

This necessitates considerations while making decisions between operating options KB2B and KB3B. Indeed, in terms of the flooded area, scenarios KB2B and KB3B have similar results. In terms of downstream water supply safety and power output, scenario KB2B is better. However, the longer duration of inundation ( $T_{BD3}$ ) in scenario KB2B could result in more damage. It is possible for the decision-makers to select the most suitable solution depending on their interest in flood damage, or power output, or water supply safety.

## CONCLUSIONS

The different reservoir operation strategies and the urbanization process had a significant impact on the magnitude and distribution of inundation in the Vu Gia Thu Bon river basin. For the impact of urbanization, the establishment of urban areas increased the flooded area in the surrounding areas with flood depths of more than 3 m. This is an important consideration when developing new urban areas and should be avoided in the future. Furthermore, when new roads are constructed, they must be raised to accommodate traffic during the flood season, thereby limiting flood drainage and significantly altering flooded areas. The difference in water levels between the two sides of the roads might be up to 2 m.

For the impacts of reservoir operation, when  $V_{pl}$  increases from 10% to 30% of the  $V_{hi}$ , the water levels decrease by 29.5, 6.4, 21.4, 6.0%, at the stations of Hoi An, Giao Thuy, Cam Le, and Ai Nghia, respectively; meanwhile the flooded area decreases by 11.7%. The results also reveal that the current inter-reservoir operation procedure scenario and the  $V_{pl}=20\%$  of the  $V_{hi}$  scenario produce equal results in terms of flooded area. The reservoir operation according to the inter-reservoir operation procedures is considered safe to supply water since the reservoir water level is maintained at a higher level, but the inundation duration is longer, resulting in more damage than the scenario of  $V_{pl}=20\%$   $V_{hi}$ . The findings of this study will assist authorities in considering damages while making judgments on flood mitigation solutions and noting the corresponding economic losses. Moreover, they will be extremely valuable in improving the current inter-reservoir procedure, which has shortcomings.

## ACKNOWLEDGEMENTS

The authors wish to express their appreciation to the Ministry of Education and Training for supporting this research project # B2021-DNA-13.

## CONFLICT OF INTEREST

The authors declared that there is no conflict of interest.

## DATA AVAILABILITY STATEMENT

Data cannot be made publicly available; readers should contact the corresponding author for details.

## REFERENCES

- Adikari, Y., Osti, R. & Noro, T. 2010 Flood-related disaster vulnerability: an impending crisis of megacities in Asia. *Journal of Flood Risk Management* **3** (3), 185–191.
- Chau, V. N., Cassells, S. & Holland, J. 2015 Economic impact upon agricultural production from extreme flood events in qQuang Nam, Central Vietnam. *Natural Hazards* **75** (2), 1747–1765.
- Chen, Y., Zhou, H., Zhang, H., Du, G. & Zhou, J. 2015 Urban flood risk warning under rapid urbanization. *Environmental Research* **139**, 3–10.
- Do, T. V., Nagasawa, R. & Tsutsui, K. 2013 Analysis of urban expansion and flood risk change in Da Nang City in Central Vietnam. *Journal of the Japanese Agricultural Systems Society* **29** (3), 123–134.
- Firoz, A. B. M., Nauditt, A., Fink, M. & Ribbe, L. 2018 Quantifying human impacts on hydrological drought using a combined modelling approach in a tropical river basin in central Vietnam. *Hydrology and Earth System Sciences* **22** (1), 547.
- Gill, M. A. 1978 Flood routing by the Muskingum method. *Journal of Hydrology* **36** (3–4), 353–363.
- Grove, M., Harbor, J., Engel, B. & Muthukrishnan, S. 2001 Impacts of urbanization on surface hydrology, Little Eagle Creek, Indiana and analysis of LTHIA model sensitivity to data resolution. *Physical Geography* **22** (2), 135–153.
- Ho, L. T. K. & Umitsu, M. 2011 Micro-Landform classification and flood hazard assessment of the Thu Bon alluvial plain, central Vietnam via an integrated method utilizing remotely sensed data. *Applied Geography* **31** (3), 1082–1093.
- Huang, Q., Wang, J., Li, M., Fei, M. & Dong, J. 2017 Modeling the influence of urbanization on urban pluvial flooding: a scenario-based case study in Shanghai, China. *Natural Hazards* **87** (2), 1035–1055.
- Huong, H. T. L. & Pathirana, A. 2013 Urbanization and climate change impacts on future urban flooding in Can Tho City, Vietnam. *Hydrology and Earth System Sciences* **17** (1), 379–394.
- Kadam, P. & Sen, D. 2012 Flood inundation simulation in Ajoy River using MIKE-FLOOD. *ISH Journal of Hydraulic Engineering* **18** (2), 129–141.
- Le, H., Cong Vu, H. & Nga To, T. 2021 An efficient reservoir operation to reduce saltwater intrusion in the Vu Gia-Thu Bon River Basin. *Journal of Hunan University Natural Sciences* **48**, 10.
- Li, Y. & Wang, C. 2009 Impacts of urbanization on surface runoff of the Dardenne Creek watershed, St. Charles County, Missouri. *Physical Geography* **30** (6), 556–573.
- Luu, C., Von Meding, J., Kanjanabootra, S. & Pham, D. 2015 A Proposed Flood Risk Assessment Method for Central Vietnam. In: *5th International Conference on Building Resilience*.
- Lyu, H.-M., Zhou, W.-H., Shen, S.-L. & Zhou, A.-N. 2020 Inundation risk assessment of metro system using AHP and TFN-AHP in Shenzhen. *Sustainable Cities and Society* **56**, 102103.
- Mateo, C. M., Hanasaki, N., Komori, D., Tanaka, K., Kiguchi, M., Champathong, A., Sukhapunnaphan, T., Yamazaki, D. & Oki, T. 2014 Assessing the impacts of reservoir operation to floodplain inundation by combining hydrological, reservoir management, and hydrodynamic models. *Water Resources Research* **50** (9), 7245–7266.
- Mei, C., Liu, J., Wang, H., Li, Z., Yang, Z., Shao, W., Ding, X., Weng, B., Yu, Y. & Yan, D. 2020 Urban flood inundation and damage assessment based on numerical simulations of design rainstorms with different characteristics. *Science China Technological Sciences* **63** (11), 2292–2304.
- Miller, J. D. & Hutchins, M. 2017 The impacts of urbanisation and climate change on urban flooding and urban water quality: a review of the evidence concerning the United Kingdom. *Journal of Hydrology: Regional Studies* **12**, 345–362.
- Moriasi, D. N., Arnold, J. G., Van Liew, M. W., Bingner, R. L., Harmel, R. D. & Veith, T. L. 2007 Model evaluation guidelines for systematic quantification of accuracy in watershed simulations. *Transactions of the ASABE* **50** (3), 885–900.
- Nguyen, H. S. 2014 Application of Flood Forecasting Model for Vu Gia Thu Bon River. In: *Proceeding of the Conference of Thuy Loi University (in Vietnamese)*.
- Norouzi, H. & Bazargan, J. 2020 Flood routing by linear Muskingum method using two basic floods data using particle swarm optimization (PSO) algorithm. *Water Supply* **20** (5), 1897–1908.
- NDPC 2020 Decision Issuing the Natural Disaster Prevention and Control Plan in Quang Nam Province in Period 2021–2025. Available from: <https://quangnam.gov.vn/webcenter/documentContentDocName=PORTAL113501>.
- Patro, S., Chatterjee, C., Mohanty, S., Singh, R. & Raghuwanshi, N. S. 2009 Flood inundation modeling using MIKE FLOOD and remote sensing data. *Journal of the Indian Society of Remote Sensing* **37** (1), 107–118.
- Prime Minister 2020 Decision No. 05/2020/QĐ-TTg of Water Levels Corresponding to Flood Warning Levels in Rivers. Available from: <http://vbpl.vn/tw/Pages/vbpq-van-ban-goc.aspx?dvid=13&ItemID=140568>.

- Ridolfi, E., Di, F. S., Pandolfo, C., Berni, N., Biscarini, C. & Manciola, P. 2019 *Coping with extreme events: effect of different reservoir operation strategies on flood inundation maps*. *Water* **11** (5), 982.
- Satriagasa, M. C., Nugraha, H., Riasasi, W., Ayuningtyas, E., Rusdimi, A. U. & Mardiatno, D. 2014 Community-based flood adaptation in Vu Gia-Thu Bon Watershed, Central Vietnam. In: *6th Indonesia Japan Joint Scientific Symposium*, Yogyakarta, pp. 28–30.
- Suriya, S. & Mudgal, B. V. 2012 *Impact of urbanization on flooding: the Thirusoolam sub watershed—a case study*. *Journal of Hydrology* **412**, 210–219.
- Thanh Son, N., Thi Thu Trang, N., Thanh Bui, X. & Thi Da, C. 2021 *Remote sensing and GIS for urbanization and flood risk assessment in Phnom Penh, Cambodia*. *Geocarto International* **36**, 1–18.
- To, T. N. & Le, H. Project: 'The Impact of Bridges and Roads on Flood in Danang City' (in Vietnamese). Chủ đầu tư: TPĐN.
- To, T. N., Vu, H. C. & Le, H. 2019 The impacts of urbanization on urban flooding in Danang City, Vietnam. In: *CIGOS 2019, Hanoi City, Innovation for Sustainable Infrastructure*. Edited by Cuong, H. M., Dong, V. D., Farid, B., Sybil, D., Dat, V. K. H. D. & Anh, M. T. Springer, pp. 1057–1062.
- Tran, G. P. 2015 *Report on Reducing the Risk of Flooding Due to Urbanization in Danang*. Available from: <https://danang.gov.vn/chinh-quyen/>.
- Tran, V. T. 2013 *Inundation Map in the Downstream of Vu Gia-Thu Bon Basin*. Master's thesis (in Vietnamese).
- Tran, P., Marincioni, F., Shaw, R. & Sarti, M. 2008 *Flood risk management in central viet Nam: challenges and potentials*. *Natural Hazards* **46** (1), 119–138.
- Vân, Đ. T. 2015 *Developing Flood Forecasting Methods for the Operation of Reservoir Systems in Vu Gia-Thu Bon River Basin*. Master's thesis (in Vietnamese).
- Vu, H. C., Le, H. & To, T. N. 2021 Improvement of multi-purpose reservoirs operation: a case study in Tra Khuc River Basin, Vietnam. *Journal of Hunan University Natural Sciences* **48**, 7.
- Waghwal, R. K. & Agnihotri, P. G. 2019 *Assessing the impact index of urbanization index on urban flood risk*. *International Journal of Recent Technology and Engineering* **8**, 509–512.
- Wang, X. & Xie, H. 2018 *A review on applications of remote sensing and geographic information systems (GIS) in water resources and flood risk management*. *Water* **10** (5), 608.
- Weng, Q. 2001 *Modeling urban growth effects on surface runoff with the integration of remote sensing and GIS*. *Environmental Management* **28** (6), 737–748.
- Yin, J., Yu, D., Yin, Z., Liu, M. & He, Q. 2016 *Evaluating the impact and risk of pluvial flash flood on intra-urban road network: a case study in the City Center of Shanghai, China*. *Journal of Hydrology* **537**, 138–145.

First received 23 December 2021; accepted in revised form 22 February 2022. Available online 8 March 2022
